# Supplementary material for: Protein association changes in the Hedgehog signaling complex mediate differential signaling strength
Source: Oxford University Press journal article supplement (doi:10.1242/dev.166850), 2018-12-12
Supplement: dev166850supp.pdf [file dev166850supp.pdf]

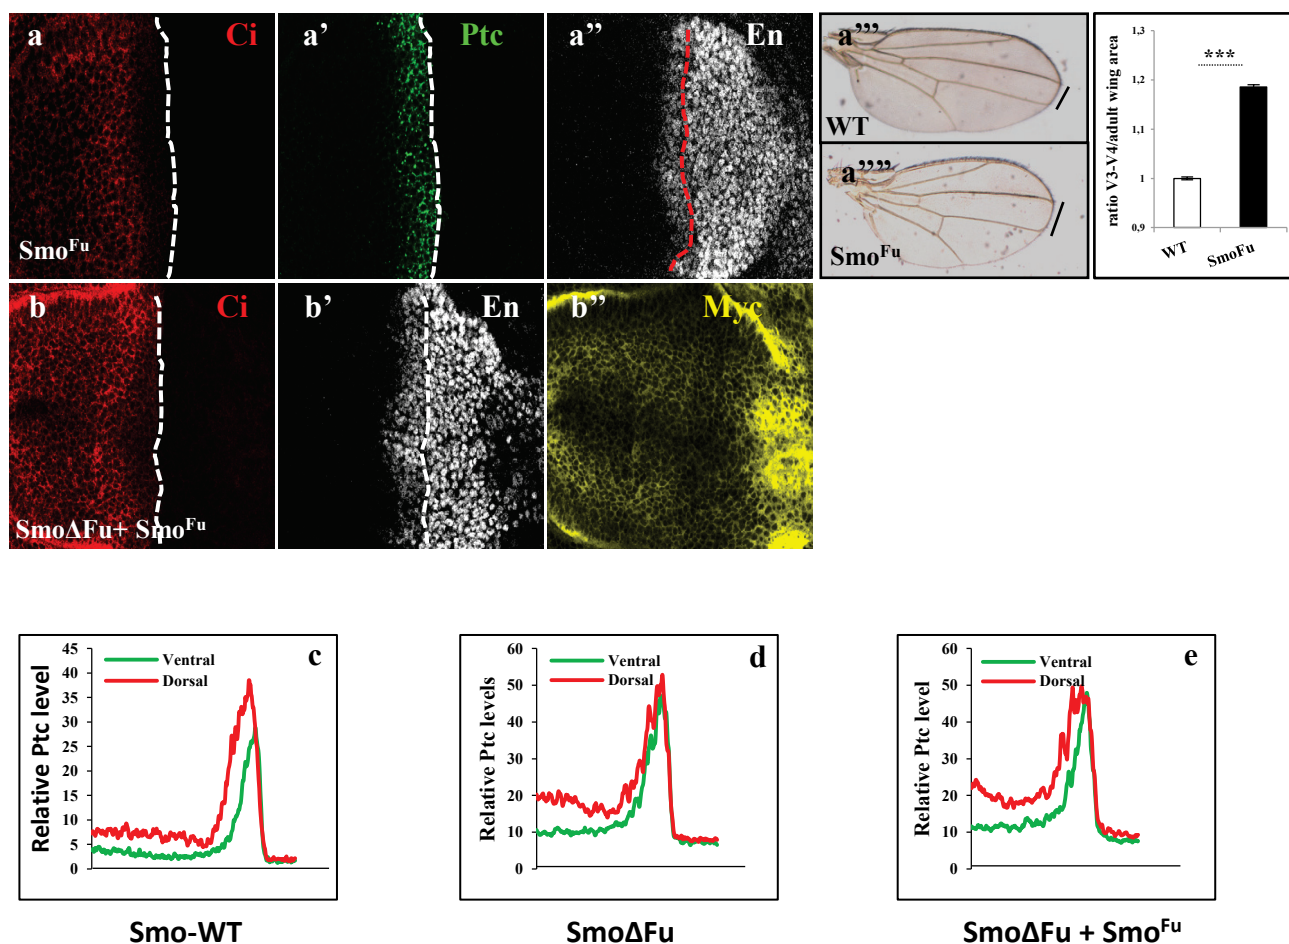

**Figure S1. The last 52 amino acids of Smo activate the Hh pathway**

(a) A wing disc expressing Smo<sup>Fu</sup>-Myc driven by *rotund*-Gal4 (*rngal4*) was stained for Ci155 (red, a), Ptc (green, a') and En (grey, a''). Representative examples of adult wings from controls (a''') or animals expressing Smo<sup>Fu</sup> using *rn*-Gal4 driver (a''') with quantification of the V3-V4 intervein space on the right panel (means  $\pm$  s.d of 10 wings \*\*\* $p < 0,001$ ). (b) Smo<sup>Fu</sup> and Smo $\Delta$ Fu were expressed in the pouch of the disc by using *rngal4* driver. Ci (red, b), En (grey, b') and Myc (yellow, b'') were analysed by immunostaining. (c-e). From the figures 1j-l, related quantification graphs (n=4 discs) of Ptc in wing discs expressing Smo-WT (graph c, Fig. 1j), Smo $\Delta$ Fu (graph d, Fig. 1k) or Smo $\Delta$ Fu and Smo<sup>Fu</sup> (graph e, Fig. 1l).

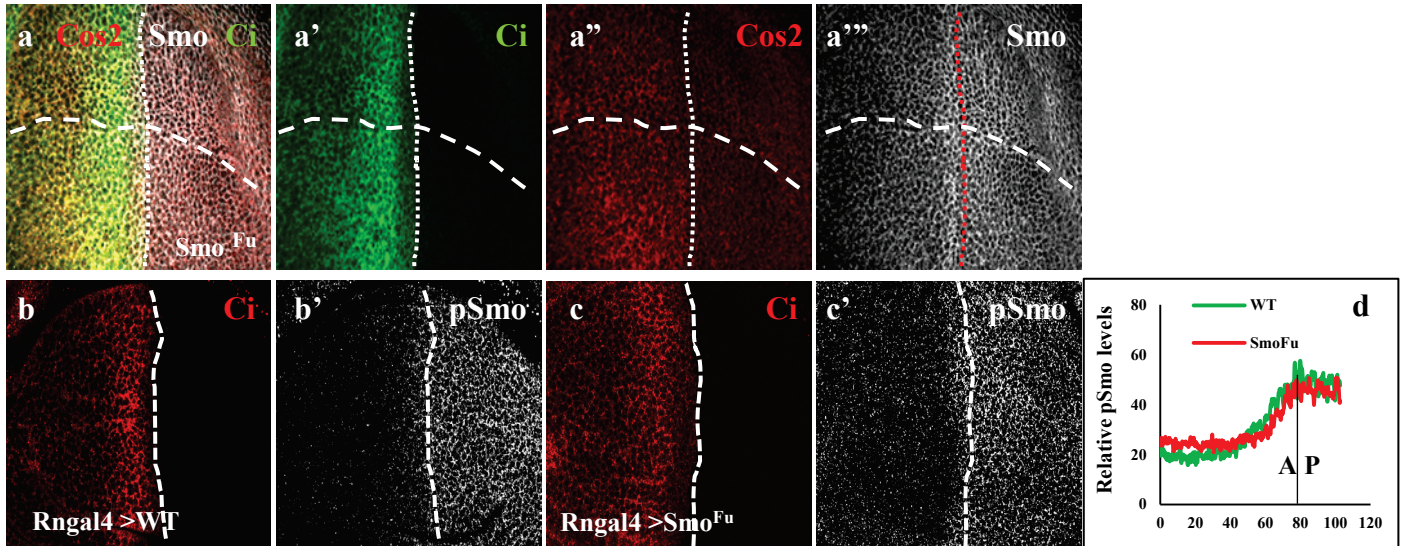

**e**

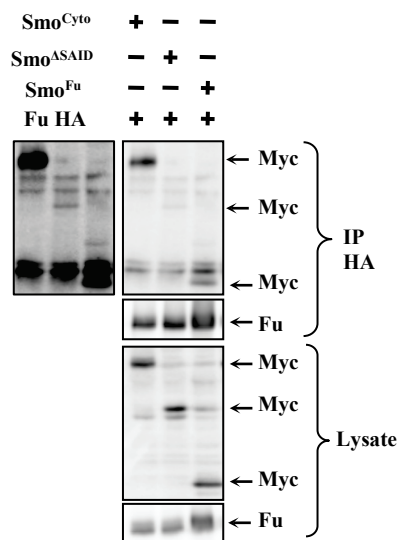

**f**

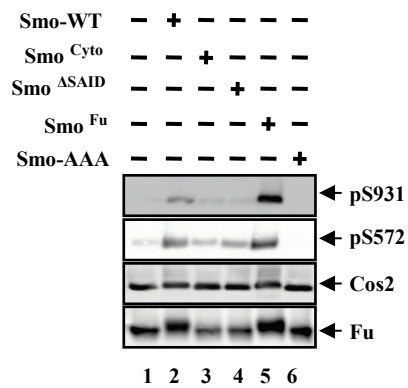

**Figure S2. The very last amino acids of Smo promote Fu kinase activity *in vivo***

(a) Wing discs expressing Smo<sup>Fu</sup> driven by *apt*-Gal4 were stained for Cos2 (red, a, a''), Ci (green, a) and Smo (grey, a'''). (b-c) Wild-type imaginal wing discs (b) or wing discs expressing Smo<sup>Fu</sup>-Myc (c) driven by *rotund*-Gal4 (*rngal4*) were stained for Ci155 (red, b, c) and phospho-Smo (pSmo) against the serine at position 687 (PKA phospho site), (grey, b', c'). (d) Related quantification graph (n=4 discs for each condition) of pSmo in WT (b') or Smo<sup>Fu</sup>-expressing wing discs (c'). (e) S2R+ cells were transfected with Fu-WT-HA and variants of Smo. Cell lysates were subjected to immunoprecipitation with HA-antibody, and the presence of Smo was analyzed by Western blotting. Two exposures of IP HA are shown. (f) S2R+ cells were transfected with indicated Smo constructs in presence of Fu-WT and Cos2, and lysates were analyzed by Western blotting for the presence of pS572, pS931, Cos2 and Fu.

**a**

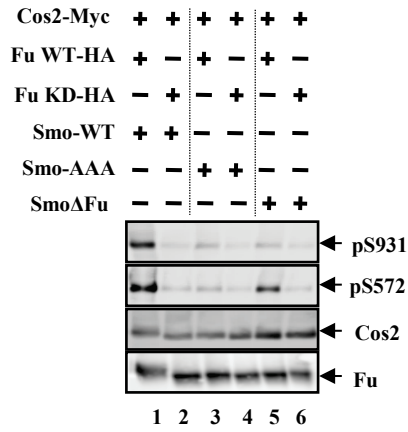

**b**

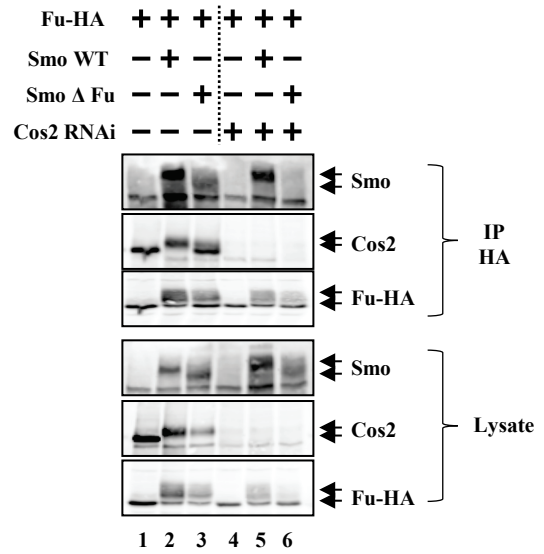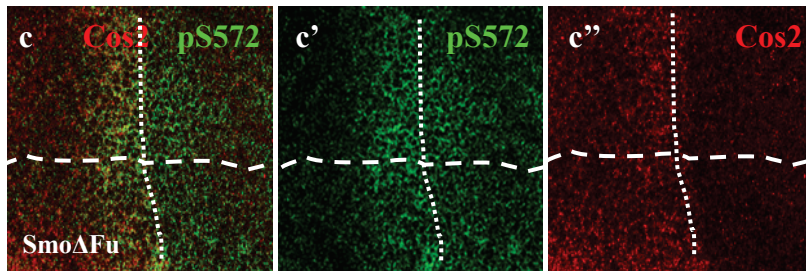

**d**

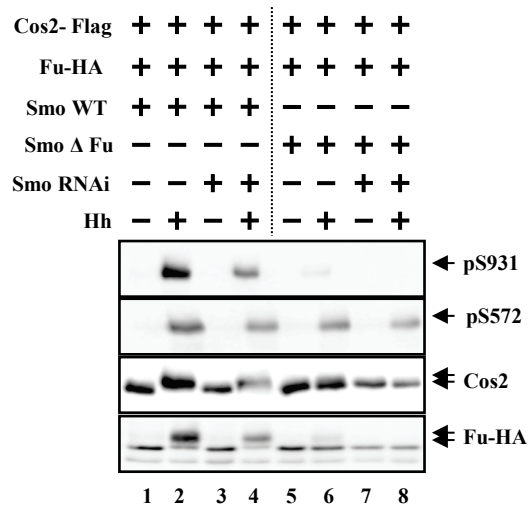

**e**

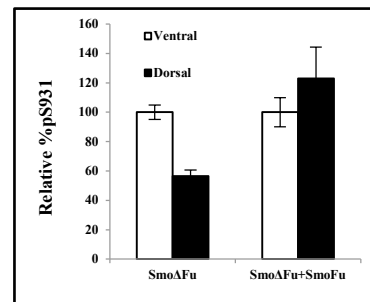

**Figure S3. The very last amino acids of Smo promote Fu kinase activity *in vitro***

(a) S2R<sup>+</sup> cells were transfected with indicated constructs, and lysates were analyzed by Western blotting for the presence of pS572, pS931, Fu and Cos2. (b) S2R<sup>+</sup> cells were transfected with indicated Smo constructs and Fu-WT. Endogenous Cos2 is depleted by RNAi (lanes 4 to 6). After transfection, Fu immunoprecipitations were analyzed for the presence of Smo variants. Note that Smo $\Delta$ Fu weakly binds Fu even in absence of endogenous Cos2 (lane 6 compared to lane 3). (c) Wing discs expressing Smo $\Delta$ Fu driven with *apt*-Gal4 were stained for Cos2 (red, c, c'') and pSer572 (green, c, c'). (d) S2R<sup>+</sup> cells expressing Cos2-Flag, Fu-HA, Smo-WT or Smo $\Delta$ Fu were treated with or without Hh in which endogenous Smo has been removed using a dsRNAi against the 3'UTR of Smo as it is described in the figure. Lysates were analyzed by Western blot for the phosphorylation on of pS572, pS931 and for the presence of Fu and Cos2. Note that the phosphorylation on S931 is lost when Smo $\Delta$ Fu is expressed (lane 8 compared to lane 4). (e) From the figure 2h-I, relative amount of pS931 staining of Smo $\Delta$ Fu and Smo<sup>Fu</sup>Myc + Smo $\Delta$ Fu in both compartments (n=8 discs).

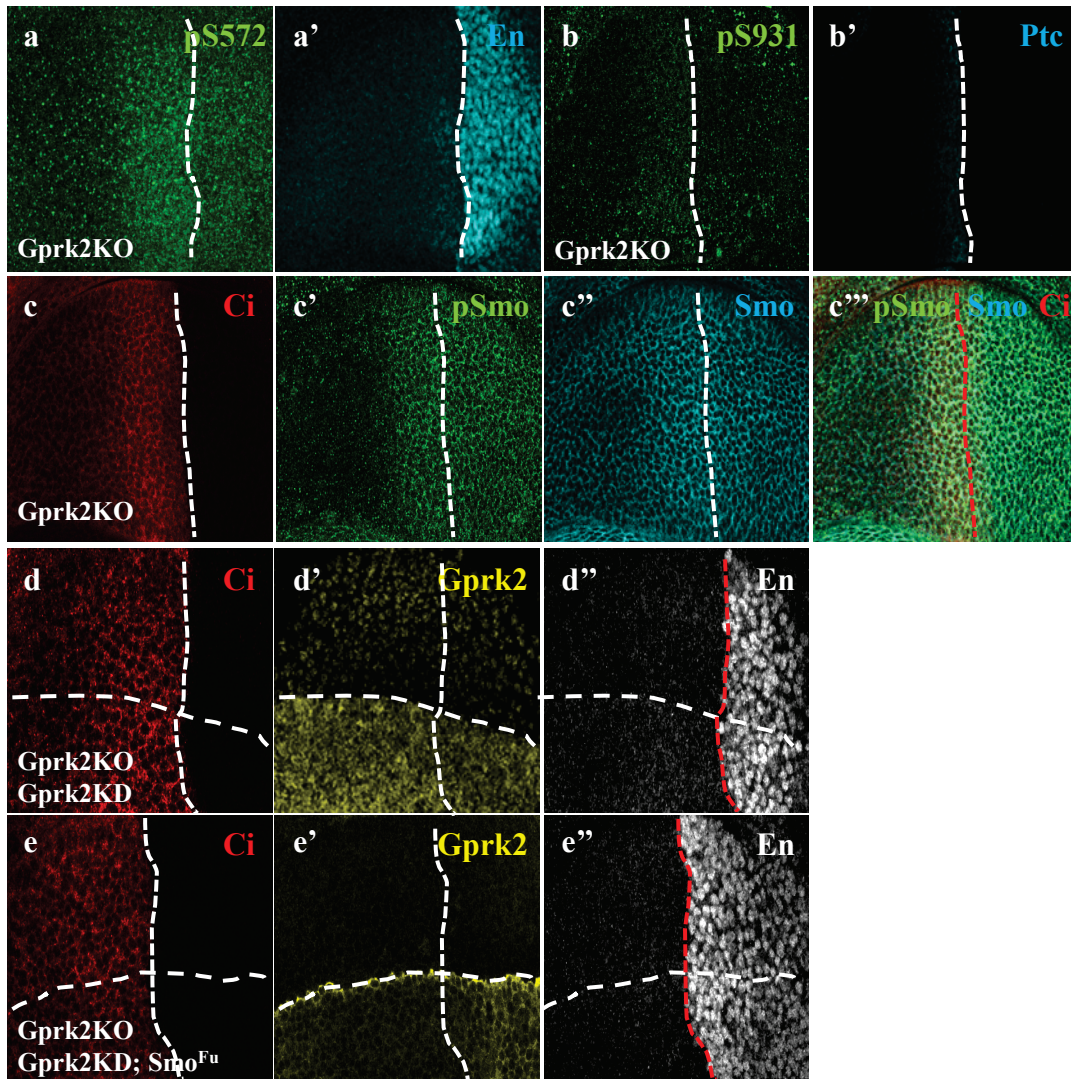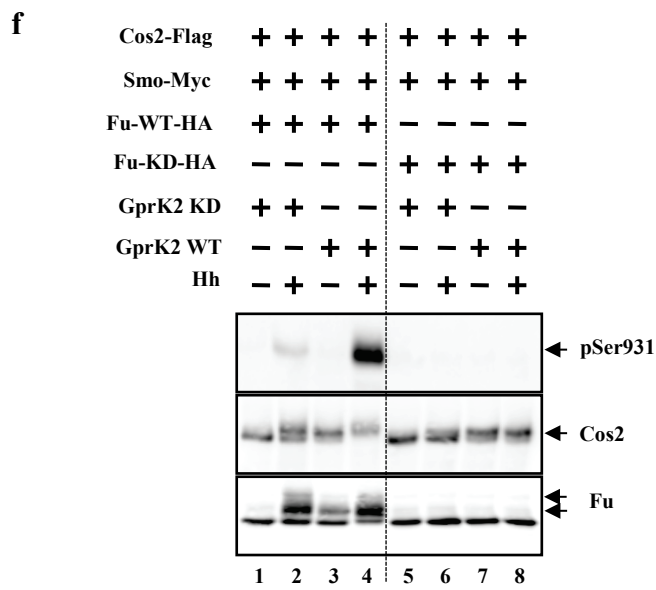

**Figure S4. Gprk2 modulates the activity of the kinase Fu by acting on Smo**

(a-c) Wing discs from *gprk2* KO mutant were immunostained for pS572 (green, a), En (blue, a'), pS931 (green, b), Ptc (blue, c'), Ci155 (red, c, c'''), phospho-Smo (green, c', c''') and Smo (blue, c'', c'''). (d-e) Wing discs from the *gprk2* KO mutant expressing Gprk2-KD alone (d) or with Smo<sup>Fu</sup>-Myc (e) by using *ap-gal4* driver were stained for Ci155 (red, d, e), Gprk2 (yellow, d', e') and En (grey, d'', e''). (f) S2R<sup>+</sup> cells were transfected with Smo, Cos2, Fu-WT, Fu-KD, GprK2-WT and GprK2-KD in absence or presence of Hh. Lysates were analyzed by Western blotting for the presence of pS931, Fu and Cos2. Note that the absence of shift electromobility of Fu-KD protein in any conditions of transfection.

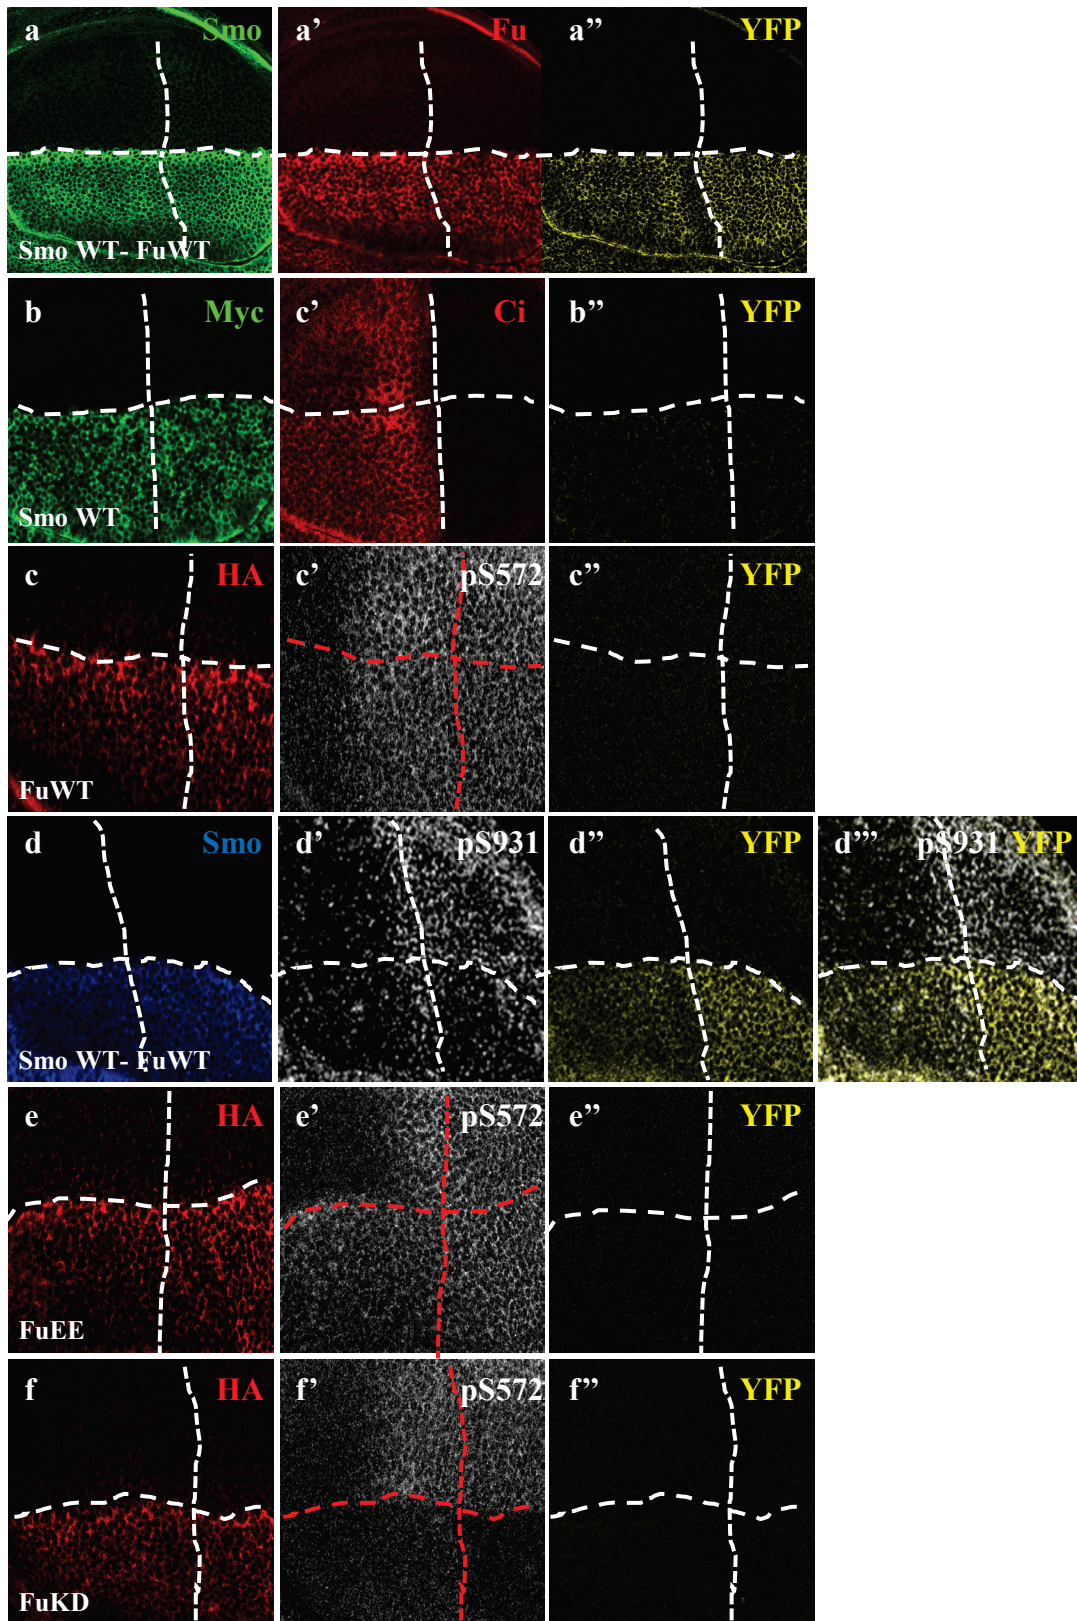



**Figure S5. Smo and Fu regulate the phosphorylation of Cos2 *in vivo***

(a) Wing imaginal discs co-expressing Smo-WT-N-YFP-Myc and HA-C-YFP-Fu-WT in the dorsal compartment, were stained for Smo (green, a), Fu (red, a'). YFP signal was shown in yellow for a''. (b-c) Wing imaginal discs expressing individually Smo-WT-N-YFP-Myc (b) or HA-C-YFP-Fu-WT (c) in the dorsal compartment using *ap*-Gal4 driver were stained for Myc (green, b), Ci (red, b'), HA (red, c) and pS572 (grey, c'). YFP signal was detected in yellow for b'' to c''. (d) Wing imaginal discs co-expressing Smo-WT-N-YFP-Myc and HA-C-YFP-Fu-WT in the dorsal compartment, were stained for Smo (blue, d), pS931 (grey d, d''). YFP signal was shown in yellow for d''-d'''. (e-f) Wing imaginal discs expressing individually HA-C-YFP-Fu-EE (e) or HA-C-YFP-Fu-KD (f) in the dorsal compartment using *ap*-Gal4 driver were stained for HA (red, e, f) and pS572 (grey, e', f'). YFP signal was detected in yellow for e'' to f''.

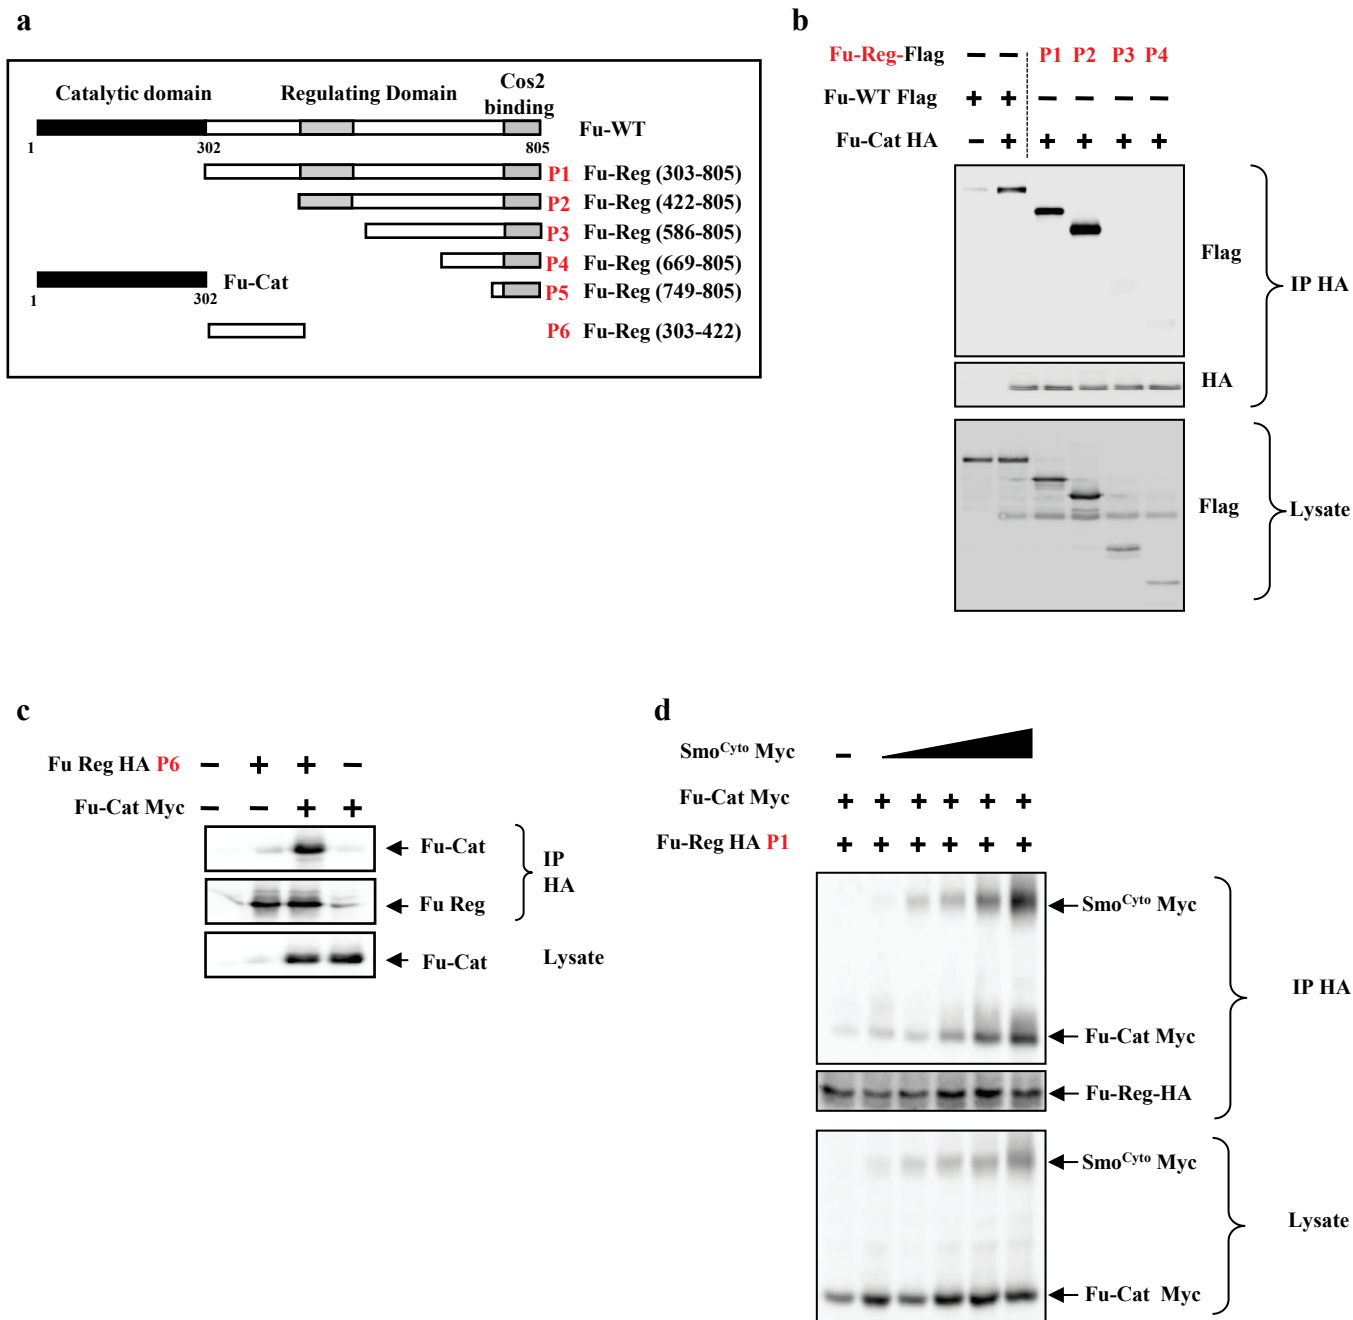

**Figure S6. Association of the Fu regulatory domain with Fu catalytic domain and Smo**

(a) Schematic representation of Fu-WT and Fu variants with various deletions of its regulatory domain. (b) S2R+ Cells were transfected with indicated Fu-Reg-Flag constructs described in (a) in presence of Fu-Cat-HA. After Fu-Cat immunoprecipitations using a HA antibody, the extracts were analyzed for the presence of Fu-Reg variants using a Flag antibody. (c) S2R+ cells were transfected with Fu-Reg-P6 in presence of Fu-Cat. Fu-Reg immunoprecipitates were analyzed for the presence of Fu-Cat. (d) After transfection with the indicated constructs, a fixed amount of Fu-Reg P1-HA and Fu-Cat in presence of an increasing amount of Smo<sup>Cyto</sup>, Fu-Reg HA immunoprecipitates were analyzed for the presence of Fu-Cat and Smo<sup>Cyto</sup> using Myc antibody.

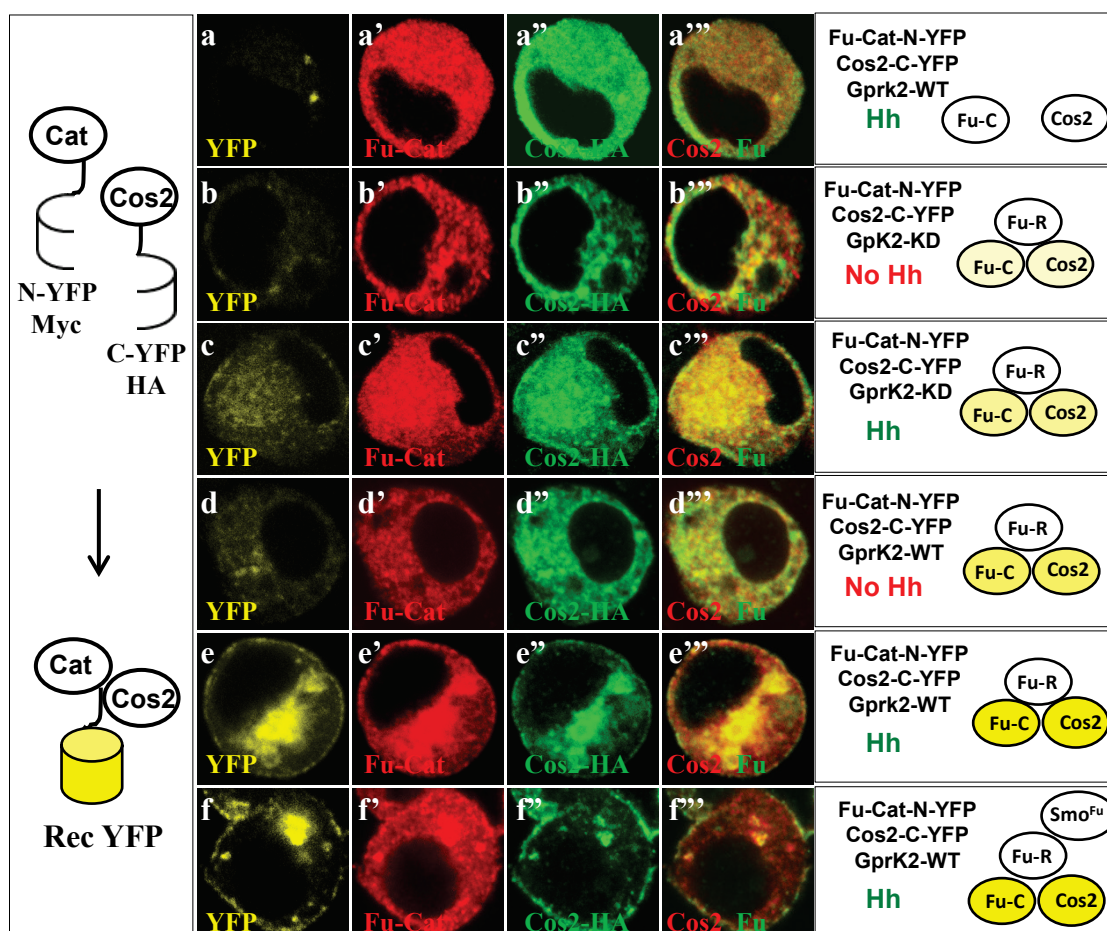

**Figure S7. The proximity of Fu-Cat with Cos2 is enhanced in presence of Hh**

(a-f) The panels of cells illustrate the BiFC experiments from the figure 8. S2R+ cells with or without Hh treatment were transfected with Fu-Cat-N-YFP-Myc and Cos2-C-YFP-HA in absence (a) or presence of Fu-Reg (b-f) or with Smo<sup>Fu</sup> (f). Schematic representations of YFP reconstituted activity are represented on the left, while the experimental conditions and structure of the protein complex are indicated on the right of each panel. Note that different GprK2 variants (GprK2-WT or GprK2-KD) are showed in each “right” panel. Transfected cells were stained for Myc (red in a'-f', a'''-f''') and HA (green, a''-f'', a'''-f'''). From a to f, YFP signals were detected in yellow.

**Table S1. Reagent type (species) or resource**

| Reagent or resource                                  | Source                    | Identifier     |
|------------------------------------------------------|---------------------------|----------------|
| <b>Antibodies</b>                                    |                           |                |
| mouse monoclonal anti-Smo 1:200                      | DSHB                      | Cat# 20C6      |
| rabbit polyclonal anti-Cos2 1:500                    | Ruel et al., 2003         |                |
| monoclonal 2A1 rat anti-Ci155 1:10                   | Motzny and Holmgren, 1995 | 2A1            |
| rabbit polyclonal anti-Fu 1:200                      | Ruel et al., 2003         |                |
| rabbit polyclonal anti-Smo 1:200                     | Ruel et al., 2003         |                |
| rabbit polyclonal anti-Cos2 1:500                    | Ruel et al., 2003         |                |
| mouse monoclonal anti-Ptc 1:200                      | DSHB                      | 5E10           |
| mouse monoclonal anti-En 1:400                       | DSHB                      | 4D9            |
| rabbit polyclonal anti-En 1:1000                     | Santa Cruz                | sc-28640       |
| rat monoclonal anti-HA 1:1000                        | Roche                     | 11 867 423 001 |
| mouse monoclonal anti-HA 1:25                        | Homemade                  | 12CA5          |
| rabbit polyclonal anti-Myc 1:100                     | Santa-Cruz                | A-14           |
| anti-pSer931-Cos2 1:250                              | Ranieri et al., 2012      |                |
| anti-pSer931-Cos2 1:250                              | Ranieri et al., 2012      |                |
| guinea pig monoclonal anti-Gprk2 1:1000              | Cheng et al., 2010        |                |
| Alexa Fluor 405 anti-antibody                        | Life technologies         |                |
| Alexa Fluor 488 anti-antibody                        | Life technologies         |                |
| Alexa Fluor 568 anti-antibody                        | Life technologies         |                |
| Alexa Fluor 647 anti-antibody                        | Life technologies         |                |
| <b>Bacterial and Virus Strains</b>                   |                           |                |
| Top10 E. Coli                                        | Invitrogen                | C404003        |
| <b>Biological Samples</b>                            |                           |                |
| Drosophila wing imaginal discs                       | This study                |                |
| <b>Chemicals, Peptides, and Recombinant Proteins</b> |                           |                |
| Bovine Calf Serum                                    | Gibco                     | 10270-106      |
| Schneider's Drosophila Medium                        | Gibco                     | 21720-024      |
| Lipofectamine LTX                                    | Invitrogen                | 15338-100      |
| Okadaic Acid (OA)                                    | Sigma-Aldrich             | 07760          |
| Halt Protease and Phosphatase Inhibitor              | Thermo Scientific         | 1861284        |

| Reagent or resource                                                                   | Source                              | Identifier  |
|---------------------------------------------------------------------------------------|-------------------------------------|-------------|
| <b>Commercial Assays</b>                                                              |                                     |             |
| Pierce ECL Western Blotting Substrate                                                 | ThermoFisher Scientific             | 32106       |
| DC Protein Assay                                                                      | Bio-Rad                             | 5000112     |
| Qiagen plasmid maxi kit                                                               | Qiagen                              | 12163       |
| <b>Experimental Models: Cell Lines</b>                                                |                                     |             |
| <i>Drosophila Schneider R+</i> cells                                                  | DGRC                                | FBrf0024118 |
| <b>Experimental Models: Organisms/Strains</b>                                         |                                     |             |
| <i>Drosophila melanogaster</i> wild-type                                              |                                     |             |
| <i>D. melanogaster</i> UAS-Smo-N-YFP                                                  | Ranieri et al., 2014                |             |
| <i>D. melanogaster</i> UAS-C-YFP-Fu-WT                                                | This paper                          |             |
| <i>D. melanogaster</i> UAS-C-YFP-Fu-EE                                                | This paper Malpel et al., 2007      |             |
| <i>D. melanogaster</i> UAS-Smo $\Delta$ Fu                                            | et al., 2007                        |             |
| <i>D. melanogaster</i> UAS-Smo <sup>Fu</sup>                                          | This paper                          |             |
| <i>D. melanogaster</i> UAS-Smo <sup>Cyto</sup>                                        | This paper                          |             |
| <i>D. melanogaster</i> UAS-Smo <sup>S<sup>AID</sup>-Fu</sup>                          | This paper                          |             |
| <i>D. melanogaster</i> gprk2 KO                                                       | Cheng et al., 2010                  |             |
| <i>D. melanogaster</i> UAS GFP Smo WT                                                 | Zhang et al., 2004                  |             |
| <i>D. melanogaster</i> UAS GFP Smo AAA                                                | Zhang et al., 2004                  |             |
| <i>D. melanogaster</i> UAS-Smo dsRNA                                                  | VDRC                                | 108351      |
| <i>D. melanogaster</i> UAS-Gprk2 dsRNA                                                | VDRC                                | 109241      |
| <i>D. melanogaster</i> apterous-Gal4                                                  | FlyBase                             | FBal0284995 |
| <i>D. melanogaster</i> rotund-Gal4                                                    | FlyBase                             | FBal0291355 |
| <i>D. melanogaster</i> UAS-Dicer2                                                     | Bloomington Drosophila Stock center | 24650       |
| <i>D. melanogaster</i> UAS-Flag-gprk2 WT                                              | Jiang et al., 2016                  |             |
| <i>D. melanogaster</i> UAS-Flag-gprk2 KD                                              | Jiang et al., 2016                  |             |
| <i>D. melanogaster</i> UAS Smo SD123                                                  | Chen et al., 2010                   |             |
| <i>D. melanogaster</i> UAS Smo GPSA                                                   | Chen et al., 2010                   |             |
| <i>D. melanogaster</i> UAS DsRNA Smo 3'UTR                                            | Maier et al., 2014                  |             |
| <b>Oligonucleotides</b>                                                               |                                     |             |
| Forward primer for Smo <sup>Cyto</sup> ,<br>CACCGGTACCATGGGCTGGACACCTTCTTCAATTGAGACTT | This paper                          | N/A         |

| Reagent or resource                                                                                    | Source     | Identifier |
|--------------------------------------------------------------------------------------------------------|------------|------------|
| Reverse primer for <i>Smo</i> <sup>Cyto</sup> ,<br>AAGCTCGAGTTTTGAAGGCAGCAATAACATTTTGAGTTTGT<br>CCGAC  | This paper | N/A        |
| Forward primer for <i>Smo</i> <sup>ΔSAID</sup> ,<br>CACCGGTACCATGGGCTCGGAGGAGGATAATCCAGAGCA<br>TCC     | This paper | N/A        |
| Reverse primer for <i>Smo</i> <sup>ΔSAID</sup> ,<br>AAGCTCGAGTTTTGAAGGCAGCAATAACATTTTGAGTTTGT<br>CCGAC | This paper | N/A        |
| Forward primer for <i>Smo</i> <sup>Fu</sup> ,<br>CACCGGTACCATGGGCAACGCAGCCAGCAGACAAAGAAC               | This paper | N/A        |
| Reverse primer for <i>Smo</i> <sup>Fu</sup> ,<br>AAGCTCGAGTTTTGAAGGCAGCAATAACATTTTGAGTTTGT<br>CCGAC    | This paper | N/A        |
| Forward primer for <i>Fu-Cat</i> ,<br>CACCGGATTCAGGATGGGCAACCGCTACGCGGTAAGCTCG                         | This paper | N/A        |
| Reverse primer for <i>Fu-Cat</i> ,<br>ACTGAATTCAAAGTCCAAAGCGGCCAGGGCCTCGTCC                            | This paper | N/A        |
| Forward primer for <i>Fu-R</i> ,<br>CACCGATCTACTAGTACCATGGGCGAGTCGCGACAGGAA<br>AACTTGACC               | This paper | N/A        |
| Reverse primer for <i>Fu-R</i> ,<br>CCGAGATCTACTAGTGGTGACGAAAAAAGTGAAGTGACTG<br>AT                     | This paper | N/A        |
| Forward primer for <i>Gprk2</i> ,<br>CACCGGTACCATGGAATTAGAGAATATTGTGGCCAA                              | This paper | N/A        |
| Reverse primer for <i>Gprk2</i> ,<br>AAGTCTAGAGCTTTCGACCGTCGTGGAGGACACGCTGTGA                          | This paper | N/A        |
| Forward primer for <i>Fu and variants</i> ,<br>CACCGAATTCAGGATGAACCGCTACGCGGTAAGCTCG                   | This paper | N/A        |
| Reverse primer for <i>Fu and variants</i> ,<br>AAGGAATTCGGTGACGAAAAAAGTGAAGTGACTGAT                    | This paper | N/A        |

| Reagent or resource                                                                      | Source               | Identifier |
|------------------------------------------------------------------------------------------|----------------------|------------|
| Forward primer for <i>PKA</i> ,<br>CACCGGTACCGAATTCAAGATGGGCAACAACGCCACCACG<br>TCGAATAAG | This paper           | N/A        |
| Reverse primer for <i>PKA</i> ,<br>AAGTCTAGAGAATTCAGCAAACCTCCTTGGCACACTTCTC              | This paper           | N/A        |
| Forward primer for <i>Smo</i> ,<br>CACCGGTACCATGCAGTACTTAAACTTTCCGCGCAT                  | This paper           | N/A        |
| Reverse primer for <i>Smo</i> ,<br>GAACTCGAGTTTTGAAGGCAGCAATAACATTTTGAGT                 | This paper           | N/A        |
| Forward primer for <i>Cos2</i> ,<br>CACCGGTACCATGGAAATACCCATTCAGTTAGCGGTGCGC             | This paper           | N/A        |
| Reverse primer for <i>Cos2</i> ,<br>AAGTCTAGAGTTTCGACGACTTGCGTCCTGGAT                    | This paper           | N/A        |
| <b>Recombinant DNA</b>                                                                   |                      |            |
| <i>pUAST Smo<sup>Cyto</sup> Myc</i>                                                      | This paper           | N/A        |
| <i>pUAST Smo<sup>ΔSAID</sup> Myc</i>                                                     | This paper           | N/A        |
| <i>pUAST Smo<sup>Fu</sup> Myc</i>                                                        | This paper           | N/A        |
| <i>pUAST Smo-WT</i> with Myc or HA tags                                                  | This paper           | N/A        |
| <i>pUAST GFP Smo-WT</i>                                                                  | Zhang et al., 2004   |            |
| <i>pUAST GFP Smo AAA</i>                                                                 | Zhang et al., 2004   |            |
| <i>pUAST Smo ΔFu</i>                                                                     | Malpel et al., 2007  |            |
| <i>pUAST Smo-Myc-N-YFP</i>                                                               | Ranieri et al., 2014 | N/A        |
| <i>pUAST C-YFP-HA-Fu WT</i>                                                              | This paper           | N/A        |
| <i>pUAST C-YFP-HA-Fu KD</i>                                                              | This paper           | N/A        |
| <i>pUAST C-YFP-HA-Fu EE</i>                                                              | This paper           | N/A        |
| <i>pUAST Gprk2-Myc-N-YFP</i>                                                             | This paper           | N/A        |
| <i>pUAST Flag-Gprk2-WT</i>                                                               | Jiang et al., 2016   |            |
| <i>pUAST Flag-Gprk2-KM</i>                                                               | Jiang et al., 2016   |            |
| <i>pUAST Gprk2</i> with Myc or HA tags                                                   | This paper           | N/A        |
| <i>pAct Ptc</i>                                                                          | Yao et al., 2006     | N/A        |
| <i>pUAST Fu-Cat</i> with HA or Myc tags                                                  | This paper           | N/A        |
| <i>pUAST Fu-Reg</i> with HA or Myc tags                                                  | This paper           | N/A        |



| Reagent or resource           | Source            | Identifier |
|-------------------------------|-------------------|------------|
| <i>pUAST Fu-WT or KD HA</i>   | This paper        | N/A        |
| <i>pUAST N-YFP-Myc-Fu-Cat</i> | This paper        | N/A        |
| <i>pUAST PKA</i>              | This paper        | N/A        |
| <i>pUAST Cos2 Myc</i>         | Ruel et al., 2007 |            |
| <i>pUAST Cos2-Myc-N-YFP</i>   | This paper        | N/A        |
